# Supplementary material for: Non-dinosaurian dinosauromorphs from the Chinle Formation (Upper Triassic) of the Eagle Basin, northern Colorado: Dromomeron romeri (Lagerpetidae) and a new taxon, Kwanasaurus williamparkeri (Silesauridae)
Source: PeerJ. 2019 Sep 3;7:e7551. doi: 10.7717/peerj.7551 (PMC6730537; doi:10.7717/peerj.7551)
Supplement: Supplemental Information 4 [file peerj-07-7551-s004.xlsx]

## Sheet: Sheet1
TAXON	ELEMENT/ SPECIMEN NUMBER	1	2	3	4	5	6	7	8	9	10	11
	SCAPULA
Dinosauriformes	DMNH EPV.67956	97.4	13.4	10.6	9.9	4.4	13.3	1.1
	HUMERUS
Dromomeron romeri?	DMNH EPV.29956	25.8	6	10.2	103.4	20.6	7.3	5.8	20.6	6.5	5.3	3.2
Kwanasaurus williamparkeri	DMNH EPV.59302	X	X	X	70.6	11	5	5.5	8.2	3.4	4.5	2.6
	ILIUM
Kwanasaurus williamparkeri	DMNH EPV.48506	39.6	22.9	11.5	10.4
Kwanasaurus williamparkeri	DMNH EPV.63653	36.4	25	10.4	X
	FEMUR
Dromomeron romeri	DMNH EPV.29965	30.9	8
Dromomeron romeri	DMNH EPV.63873	18	7.3
Kwanasaurus williamparkeri	DNMH EPV.34579	>29.2	X	181.3	NA	20.2	13	30.1	22.8	24.6	16.4
Kwanasaurus williamparkeri	DMNH EPV.44616	23.5	10.8	X	11.4	X	X	X	X	X	X
Kwanasaurus williamparkeri	DMNH EPV.54828	29.9	16.7	X	19.9	X	X	X	X	X	X
Kwanasaurus williamparkeri	DMNH EPV.56651	26.2	11.5	X	>13.4	X	X	X	X	X	X
Kwanasaurus williamparkeri	DMNH EPV.59370	X	X	X	X	X	X	18.4	11.7	11	7.7
Kwanasaurus williamparkeri	DMNH EPV.59301	5.6	X	X	X	X	X	X	X	X	X
Kwanasaurus williamparkeri	DMNH EPV.63874	>18.4	X	X	15.2	X	X	X	X	X	X
Kwanasaurus williamparkeri	DMNH EPV.63139	10.9	5.3	X	7.3	X	X	X	X	X	X
Kwanasaurus williamparkeri	DMNH EPV.67956	X	X	X	X	X	X	11.1	10	10.4	6.5
Kwanasaurus williamparkeri	DMNH EPV.125924	25.3	8.1	X	13.4	X	X	X	X	X	X
Silesauridae?	DMNH EPV.27699	X	X	X	X	X	X	X	X	X	X
Silesauridae?	DMNH EPV.34028	X	X	X	X	X	X	30.3	X	X	20.4
